# Supplementary material for: A novel 2D arsenic vanadate network grafted with a transition metal complex: [Cu(phen)]2[VIVV4VAs2O19]·0.5H2OElectronic supplementary information (ESI) available: packing diagram, IR spectrum, TG curve and a plot of χM versus T for 1. See http://www.rsc.org/suppdata/dt/b2/b210589f/
Source: Royal Society of Chemistry journal article supplement (doi:10.1039/b210589f), 2003-01-10
Supplement: b210589f.pdf [file b210589f.pdf]

## Supplementary Materials

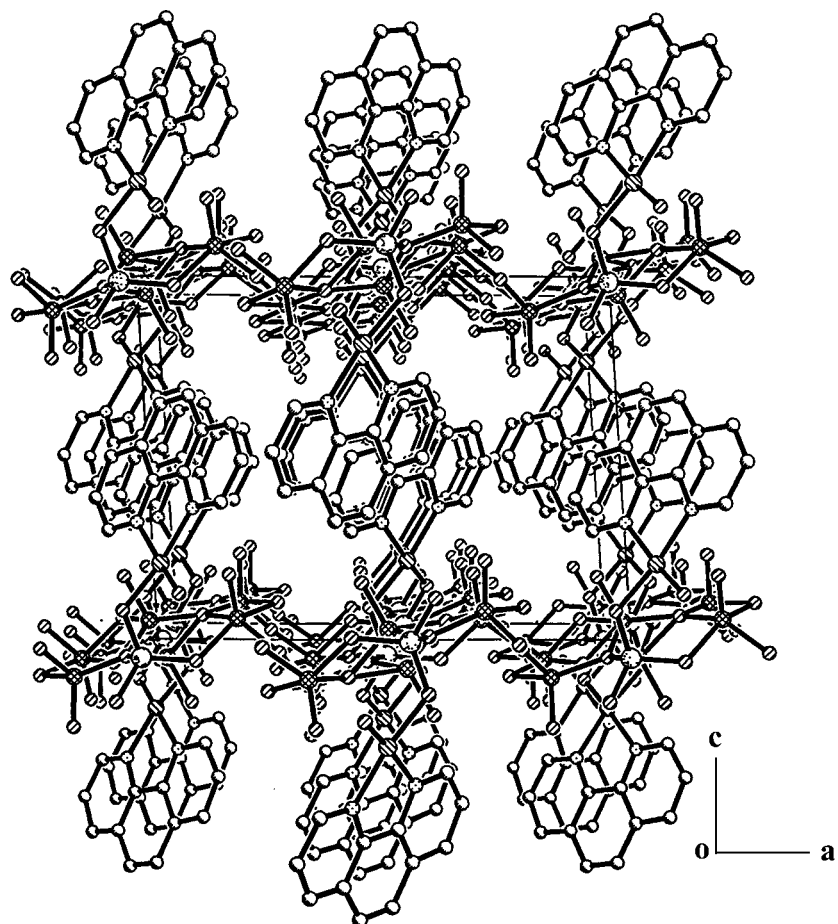

**Fig. S1** The packing arrangement of compound 1 along b axis.

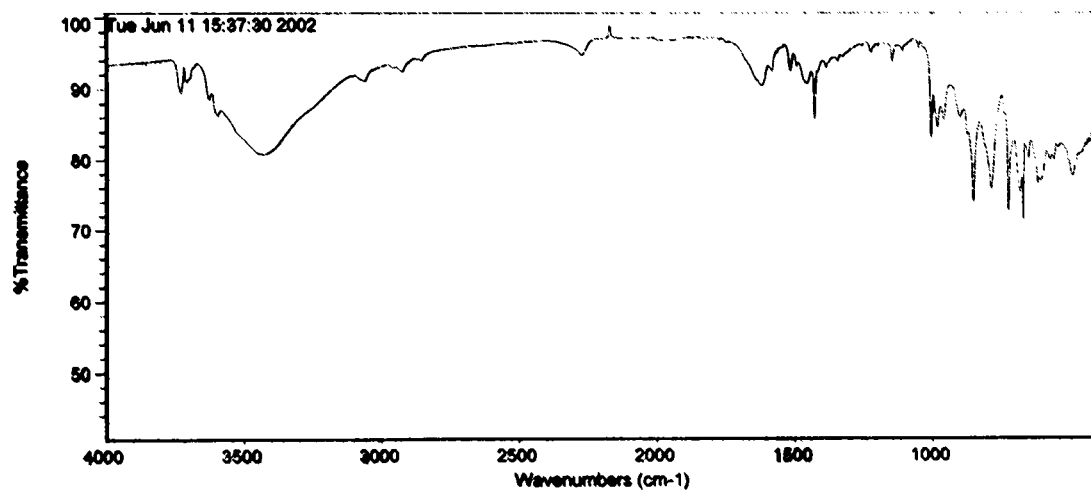

Fig. S2 The IR spectrum of compound 1.

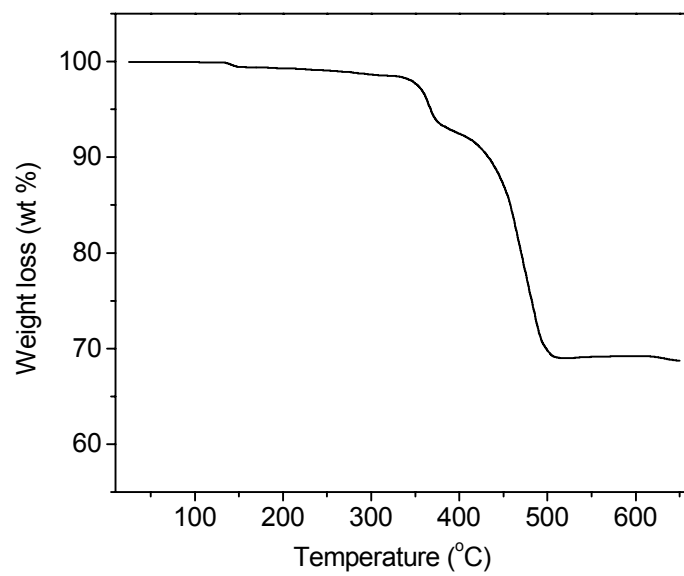

**Fig. S3** The TG curve of compound **1**.

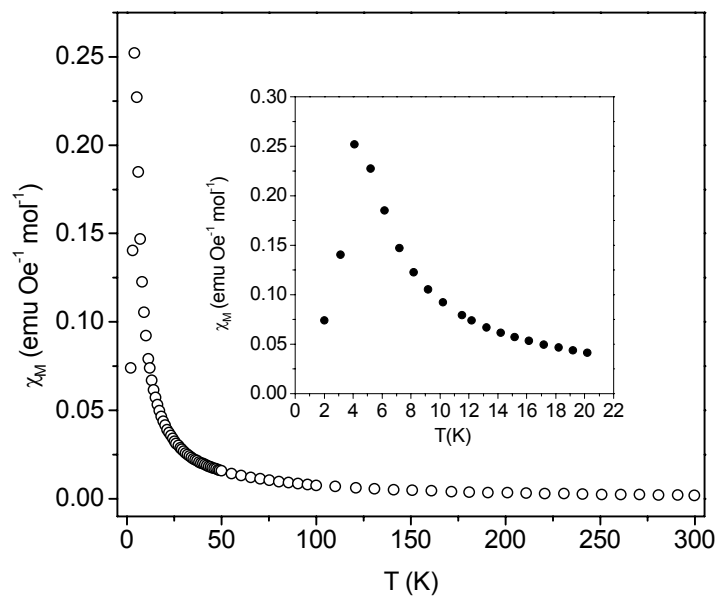

**Fig. S4** Plot of  $\chi_M$  vs temperature for **1**;

the inset shows  $\chi_M$  vs  $T$  in the range of 2-20 K.
